# Supplementary material
Source: ML conference proceedings conference paper supplement (https://www.ecva.net/papers/eccv_2020/papers_ECCV/html/123680494_ECCV_2020_paper.php)
Supplement: Supplementary file 1 [file 123680494-supp.pdf]

No supplementary material
